# Supplementary material for: Assessing the Vulnerability of Maize Crop Productivity to Precipitation Anomalies: A Case Study in the Semiarid Region of Cesar, Colombia
Source: MDPI journal article supplement (doi:10.3390/w15112108), 2023-06-02
Supplement: s1 [file s1]

Archive with 3 entries (3 files):
- FigureS1.Yield_A_V3.pdf
- FigureS2.Yield_B_V2_.pdf
- TableS1.ParameterCropMaizeAquaCrop-OS.pdf
