# Supplementary material for: Assessing the Vulnerability of Maize Crop Productivity to Precipitation Anomalies: A Case Study in the Semiarid Region of Cesar, Colombia
Source: MDPI journal article supplement (doi:10.3390/w15112108), 2023-06-02
Supplement: s1 [file s1 › TableS1.ParameterCropMaizeAquaCrop-OS.pdf]

### Input data of crop parameters used in AquaCrop-OS model

| Parameters                                                                                           | Value    |
|------------------------------------------------------------------------------------------------------|----------|
| Growing degree/Calendar days from sowing to emergence/transplant recovery                            | 5        |
| Growing degree/Calendar days from sowing to maximum rooting                                          | 49       |
| Growing degree/Calendar days from sowing to senescence                                               | 90       |
| Growing degree/Calendar days from sowing to maturity                                                 | 100      |
| Growing degree/Calendar days from sowing to start of yield formation                                 | 51       |
| Duration of flowering in growing degree/calendar days (-999 for non-fruit/grain crops)               | 10       |
| Duration of yield formation in growing degree/calendar days                                          | 51       |
| Growing degree day calculation method                                                                | 2        |
| Base temperature (degC) below which growth does not progress                                         | 8        |
| Upper temperature (degC) above which crop development no longer increases                            | 30       |
| Pollination affected by heat stress (0: No; 1: Yes)                                                  | 1        |
| Maximum air temperature (degC) above which pollination begins to fail                                | 40       |
| Maximum air temperature (degC) at which pollination completely fails                                 | 45       |
| Pollination affected by cold stress (0: No; 1: Yes)                                                  | 1        |
| Minimum air temperature (degC) below which pollination begins to fail                                | 10       |
| Minimum air temperature (degC) at which pollination completely fails                                 | 5        |
| Biomass production affected by temperature stress (0: No; 1: Yes)                                    | 1        |
| Minimum growing degree days (degC/day) required for full biomass production                          | 12       |
| Growing degree days (degC/day) at which no biomass production occurs                                 | 0        |
| Shape factor describing the reduction in biomass production for insufficient growing degree days     | 138.135  |
| Initial percentage of minimum effective rooting depth                                                | 70       |
| Minimum effective rooting depth (m)                                                                  | 0.3      |
| Maximum rooting depth (m)                                                                            | 2.3      |
| Shape factor describing root expansion                                                               | 1.3      |
| Shape factor describing the effects of water stress on root expansion                                | -6       |
| Maximum root water extraction at top of the root zone (m3/m3/day)                                    | 0.0104   |
| Maximum root water extraction at the bottom of the root zone (m3/m3/day)                             | 0.0026   |
| Exponent parameter for adjustment of Kcx once senescence is triggered                                | 1        |
| Soil surface area (cm2) covered by an individual seedling at 90% emergence                           | 6.5      |
| Number of plants per hectare                                                                         | 75000    |
| Minimum canopy size below which yield formation cannot occur                                         | 0.049    |
| Maximum canopy cover (fraction of soil cover)                                                        | 0.90     |
| Canopy decline coefficient (fraction per day/GDD)                                                    | 0.0124   |
| Canopy growth coefficient (fraction per day/GDD)                                                     | 0.0181   |
| Crop coefficient when canopy growth is complete but prior to senescence                              | 1.05     |
| Decline of crop coefficient due to ageing (%/day)                                                    | 0.3      |
| Water productivity normalized for ET0 and C02 (g/m2)                                                 | 33.7     |
| Adjustment of water productivity in yield formation stage (% of WP)                                  | 100      |
| Crop co2 sink strength coefficient                                                                   | 0.5      |
| WP co2 adjustment parameter given by Steduto et al. 2007                                             | 0.000138 |
| WP co2 adjustment parameter given by FACE experiments                                                | 0.001165 |
| Reference harvest index                                                                              | 0.40     |
| Initial harvest index                                                                                | 0.01     |
| Possible increase of harvest index due to water stress before flowering (%)                          | 0        |
| Coefficient describing positive impact on harvest index of restricted vegetative growth during yield | 7        |
| Coefficient describing negative impact on harvest index of stomatal closure during yield formation   | 3        |

|                                                                                          |       |
|------------------------------------------------------------------------------------------|-------|
| Maximum allowable increase of harvest index above reference                              | 15    |
| Crop Determinancy ('0': Indeterminant, '1': Determinant)                                 | 1     |
| Excess of potential fruits                                                               | 50    |
| Percentage of total flowering at which peak flowering occurs                             | 33.33 |
| Upper soil water depletion threshold for water stress effects on affect canopy expansion | 0.14  |
| Upper soil water depletion threshold for water stress effects on canopy stomatal control | 0.69  |
| Upper soil water depletion threshold for water stress effects on canopy senescence       | 0.69  |
| Upper soil water depletion threshold for water stress effects on canopy pollination      | 0.8   |
| Lower soil water depletion threshold for water stress effects on canopy expansion        | 0.72  |
| Lower soil water depletion threshold for water stress effects on canopy stomatal control | 1     |
| Lower soil water depletion threshold for water stress effects on canopy senescence       | 1     |
| Lower soil water depletion threshold for water stress effects on canopy pollination      | 1     |
| Shape factor describing water stress effects on canopy expansion                         | 2.9   |
| Shape factor describing water stress effects on stomatal control                         | 6     |
| Shape factor describing water stress effects on canopy senescence                        | 2.7   |
| Shape factor describing water stress effects on pollination                              | 1     |
| Adjustment to water stress thresholds depending on daily ET0 (0: 'No', 1: 'Yes')         | 1     |
| Vol (%) below saturation at which stress begins to occur due to deficient aeration       | 5     |
| Number of days lag before aeration stress affects crop growth                            | 3     |
| Reduction (%) to p_lo3 when early canopy senescence is triggered                         | 12    |
| Proportion of total water storage needed for crop to germinate                           | 0.2   |

---
