# Supplementary figures and images for: Assessing the Vulnerability of Maize Crop Productivity to Precipitation Anomalies: A Case Study in the Semiarid Region of Cesar, Colombia
Source: MDPI journal article supplement (doi:10.3390/w15112108), 2023-06-02

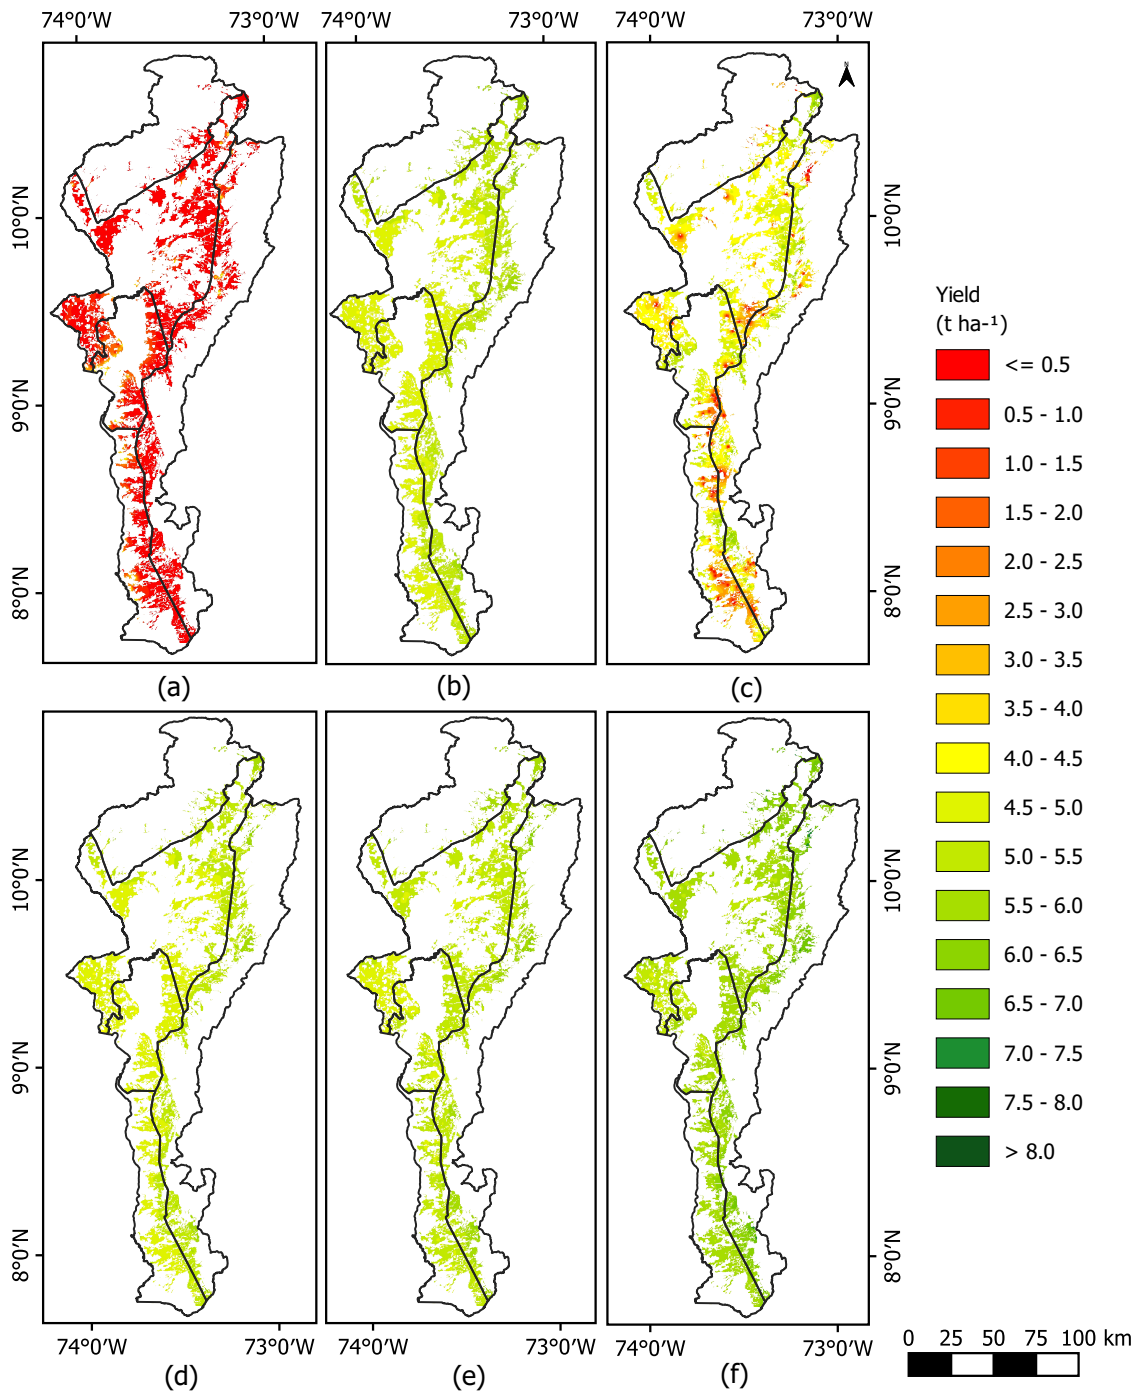

Supplement: s1 [file s1 › FigureS1.Yield_A_V3.pdf]

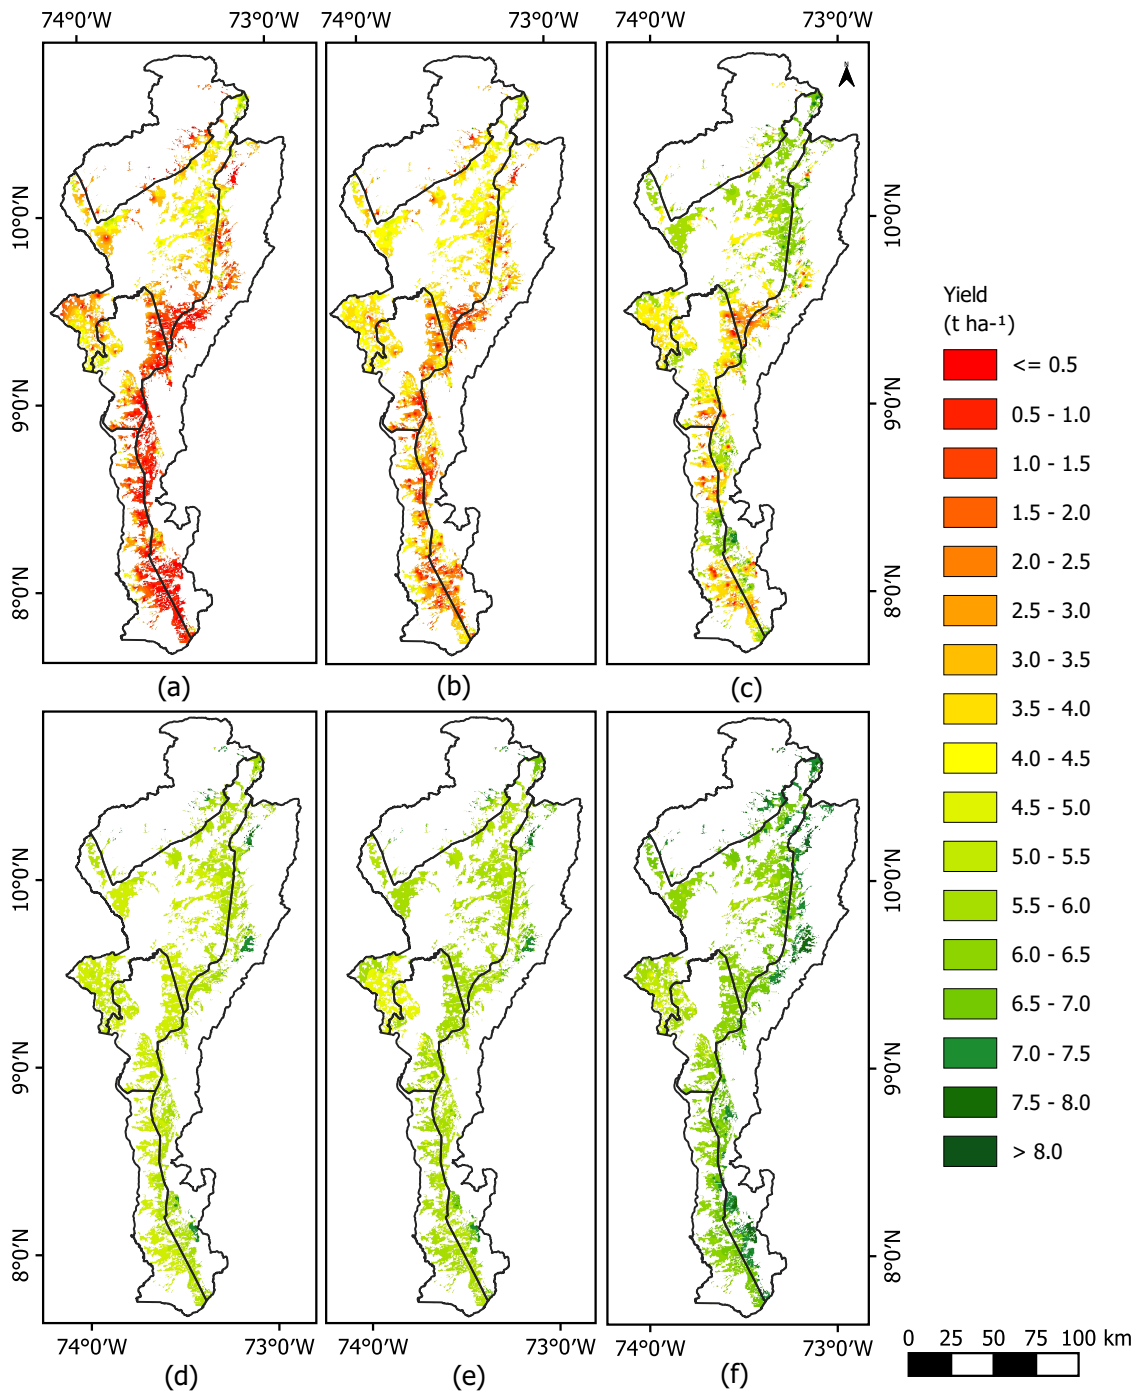

Supplement: s1 [file s1 › FigureS2.Yield_B_V2_.pdf]
